# Supplementary material for: Fabrication of Fe7S8/C flexible nanofibers with nano-buffered spaces and their application in Li-ion batteries
Source: Royal Society of Chemistry journal article supplement (doi:10.1039/d0nj02968h), 2020-01-01
Supplement: d0nj02968h1.pdf [file d0nj02968h1.pdf]

## Supporting Information for

### Fabrication of Fe<sub>7</sub>S<sub>8</sub>/C flexible nanofibers with nano-buffered space and their application in Lithium-ion Batteries

Qianhui Wu<sup>a</sup>, Renhua Xu<sup>a</sup>, Chen Qian<sup>b</sup>, Guowang Diao<sup>a</sup>, Ming Chen<sup>a,c\*</sup>

<sup>a</sup> School of Chemistry and Chemical Engineering, Yangzhou University, Yangzhou 225002, P. R. China

<sup>b</sup> College of Chemistry and Chemical Engineering, Yangzhou Polytechnic Institute, Yangzhou 225127, P. R. China

<sup>c</sup> Key Laboratory of Advanced Energy Materials Chemistry (Ministry of Education), College of Chemistry, Nankai University, Tianjin 300071, P. R. China

#### Experimental Section

##### Materials

All reagents are analytical grade and were directly used without any purification. Iron (III) chloride hexahydrate (FeCl<sub>3</sub>·6H<sub>2</sub>O, AR), sodium hydroxide (NaOH, AR), sublimed sulfur, and N,N-dimethylformamide (DMF) were supplied by Shanghai Chemical Corp. Polyacrylonitrile (PAN,  $M_w=150000$ ) was purchased from Aladdin. The electrolyte solution with 1M LiPF<sub>6</sub>/ethylene carbonate (EC)/diethyl carbonate (DMC)/ethyl methyl carbonate (EMC) (1: 1: 1 by volume) was supplied by Guangzhou Tinci Materials Technology Co. Ltd. Other chemicals and solvents are reagent grade and commercially available. Deionized water was used for all experiments.

##### Characterization

---

\* Corresponding authors.

E-mail address: chenming@yzu.edu.cn (M. Chen)

The morphologies of the samples were characterized using scanning electron microscope (SEM, Zeiss Supra 55) and Transmission Electron Microscopy (TEM, Philips Tecnai-12). High-resolution TEM (HRTEM) and high-angle annular dark-field scanning transmission electron microscopy (HAADF-STEM) were carried out on FEI Tecnai G2 F30 STWIN (USA) operating at 200 kV. X-ray diffraction (XRD) of the samples was conducted using D8 advance superspeed powder diffractometer (Bruker). Raman spectra were recorded by Renishaw in Via Raman microscope. X-ray photoelectron spectroscopic (XPS) measurements were made on Thermo Escalab 250 system. The energy-dispersive X-ray (EDX) analysis was performed on KEVEX X-ray energy detector. The magnetic measurement was characterized using vibrating sample magnetometer (VSM) (EV7, ADE, USA). Thermogravimetry analysis (TGA) (Pyris 1 TGA, PerkinElmer, USA) was performed under air atmosphere from room temperature to 800°C at a heating rate of 10°C min<sup>-1</sup>. N<sub>2</sub> adsorption/desorption isotherm with BET and Barrett-Joyner-Halenda (BJH) analysis (Autosorb IQ3, Quantachrome Instruments, USA ) were performed to clarify the specific surface area, porosity, and pore volume of the developed catalyst.

### **Electrochemical Tests**

Lithium storage performance test were characterized using 2032 type coin cells. The half cell consists of the test anode, lithium foil as cathode, 1 M LiPF<sub>6</sub> dissolved in a mixture of EC/DMC/EMC (1:1:1 by volume) as electrolyte, and the Celgard 2400 polypropylene as separator. All of them are assembled in a high-purity argon-filled glovebox (Vacuum Atmospheres Co., Ltd). The test anode was prepared by directly punching Fe<sub>7</sub>S<sub>8</sub>/C composite nanofibers film into circular electrode slice with size  $\Phi$  16 mm. Cyclic voltammetry (CV) measurements were performed on an electrochemical workstation (CHI660 E, Chenghua, CHN)

at a scan rate of  $0.1 \text{ mV s}^{-1}$  between 0.01 and 3.0 V. Electrochemical impedance spectroscopic (EIS) were carried out on an Autolab Electrochemical Analyzer (Ecochemie, Netherlands). The charge and discharge performances were recorded by a battery test system (CT-3008W, Xinwei, CHN) within a range of 0.01-3 V at different current densities.

### **Preparation of Fe<sub>7</sub>S<sub>8</sub>/C composite nanofibers**

The rod-shaped  $\alpha$ -FeOOH was prepared by a simple hydrothermal method according to reference with some modifications. About 0.75 g of polyacrylonitrile (PAN,  $M_w=150000$ ) was dissolved in 10 mL of N, N-dimethylformamide (DMF) with strong magnetic stirring for 6 h. Then 0.3 g rod-shaped  $\alpha$ -FeOOH nanoparticles were added into the DMF solution of PAN. The above-mentioned mixture solution was stirred for 10 h under room temperature. The obtained spinning solution was loaded into the syringe with a 19-gauge needle tip. For the electrospinning, the flow rate of the solution was  $0.1 \text{ mL h}^{-1}$ , the voltage between the tip and the collector was 15 kV and the distance between the tip and the collector was 15 cm. After electrospinning process, the as-prepared PAN/ $\alpha$ -FeOOH nanofibers were stabilized at  $T_1$  (250 °C) for 2 h in air. Afterwards, the nanofibers and sulfur powder were heated at  $T_2$  (500, 600 or 700 °C) for 8 h under Ar atmosphere with a heating rate of  $5 \text{ °C min}^{-1}$ . Finally, the Fe<sub>7</sub>S<sub>8</sub>/C composite nanofibers were obtained by above all process. For ease of presentation, the above products are shown in Table S1.

**Table S1** Abbreviation of various products with different preparation conditions.

| Sample | $T_1/\text{°C}$ | $T_2/\text{°C}$ | Mass ratio of nanofibers to |
|--------|-----------------|-----------------|-----------------------------|
|--------|-----------------|-----------------|-----------------------------|

---

|                                          |     |     |     |
|------------------------------------------|-----|-----|-----|
| Fe <sub>7</sub> S <sub>8</sub> /CNF2-500 | 250 | 500 | 1:2 |
| Fe <sub>7</sub> S <sub>8</sub> /CNF2-600 | 250 | 600 | 1:2 |
| Fe <sub>7</sub> S <sub>8</sub> /CNF2-700 | 250 | 700 | 1:2 |
| Fe <sub>7</sub> S <sub>8</sub> /CNF1-700 | 250 | 700 | 1:1 |
| Fe <sub>7</sub> S <sub>8</sub> /CNF3-700 | 250 | 700 | 1:3 |

---

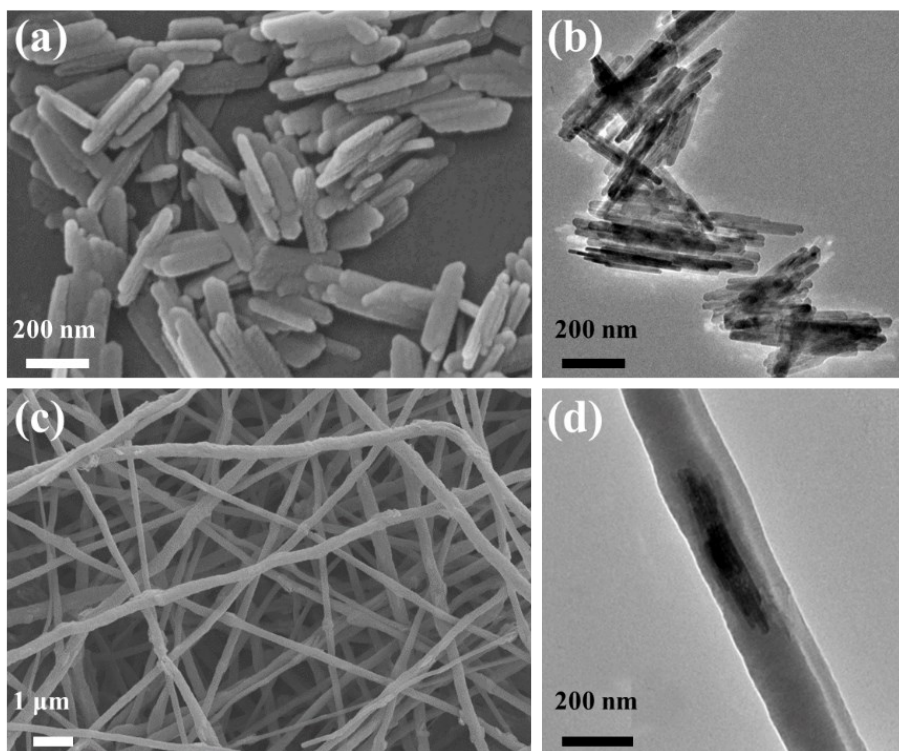

**Fig. S1** SEM and TEM images of (a-b)  $\alpha$ -FeOOH, (c-d)  $\alpha$ -FeOOH/PAN.

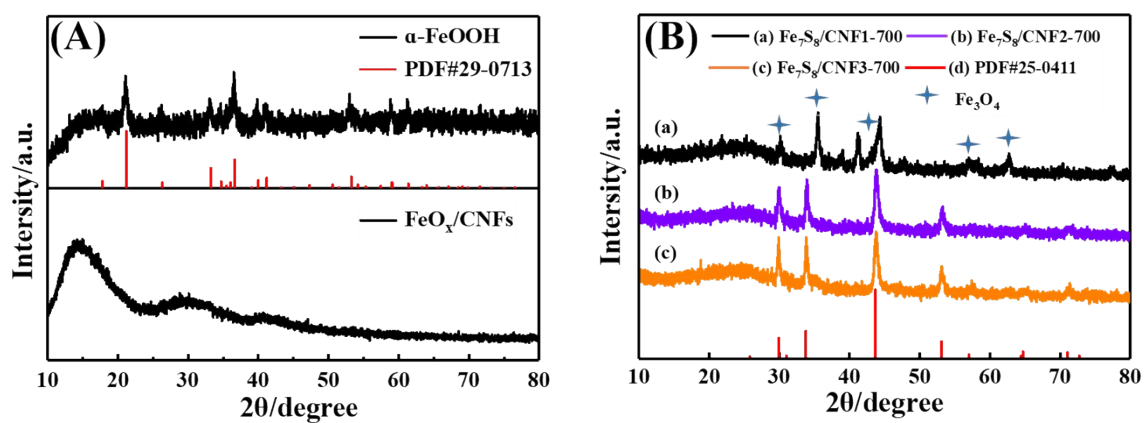

**Fig.S2** (A) XRD patterns of  $\alpha$ -FeOOH and  $\text{Fe}_2\text{O}_3/\text{CNFs}$ , (B) XRD patterns of (a)  $\text{Fe}_7\text{S}_8/\text{CNF1-700}$ , (b)  $\text{Fe}_7\text{S}_8/\text{CNF2-700}$  and (c)  $\text{Fe}_7\text{S}_8/\text{CNF3-700}$ .

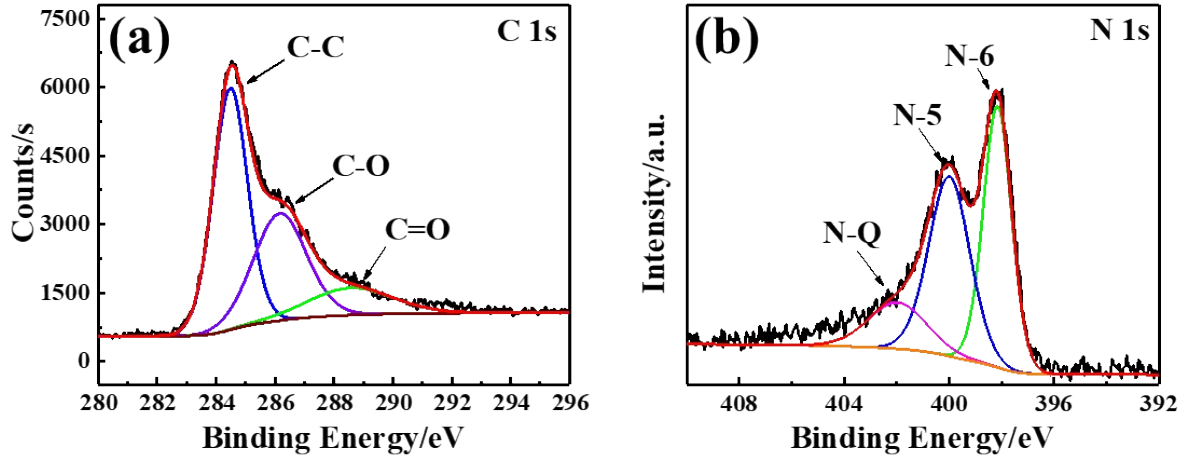

**Fig. S3** XPS spectra of the  $\text{Fe}_7\text{S}_8/\text{CNF2-700}$ : high-resolution XPS spectra of (a) C1s and (b) N1s.

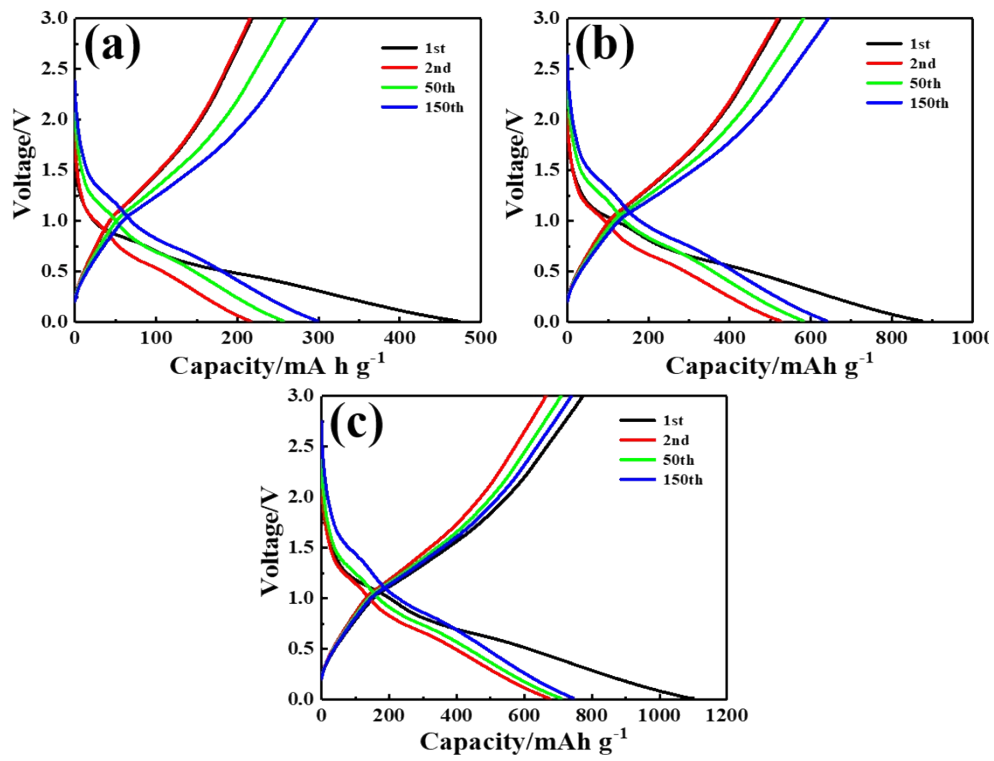

**Fig. S4** Charge/discharge voltage profiles of (a)  $\text{Fe}_7\text{S}_8/\text{CNF2-500}$ , (b)  $\text{Fe}_7\text{S}_8/\text{CNF2-600}$  and (c)  $\text{Fe}_7\text{S}_8/\text{CNF2-700}$  at  $1\text{A g}^{-1}$ .

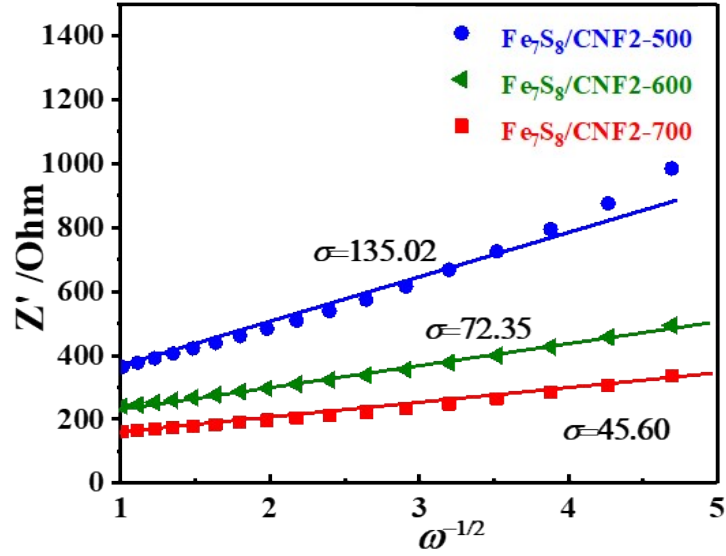

**Fig. S5** Graph of the  $Z'$  plotted against  $\omega^{-1/2}$  at low frequency region of  $\text{Fe}_7\text{S}_8/\text{CNF2-500}$ ,  $\text{Fe}_7\text{S}_8/\text{CNF2-600}$  and  $\text{Fe}_7\text{S}_8/\text{CNF2-700}$ .

**Table S2** Comparison between the electrochemical data of  $\text{Fe}_7\text{S}_8/\text{C}$  for LIBs performance.

| Active material                                            | Specific current | Initial capacity | nth cycle Reversible      | References |
|------------------------------------------------------------|------------------|------------------|---------------------------|------------|
| $\text{Fe}_7\text{S}_8@\text{NC-PS}$                       | 500              | 1346             | 1130 (100 <sup>th</sup> ) | [1]        |
| $\text{Fe}_7\text{S}_8/\text{C}/\text{RGO}$                | 200              | 842              | 615 (500 <sup>th</sup> )  | [2]        |
| $\text{Fe}_7\text{S}_8@\text{C}$<br>(Core-shell structure) | 200              | 1368             | 815 (50 <sup>th</sup> )   | [3]        |
| $\text{Fe}_7\text{S}_8@\text{C}$ nanorods                  | 100              | 1045             | 825 (100 <sup>th</sup> )  | [4]        |
| $\text{Fe}_7\text{S}_8@\text{C}$ nanobiscuits              | 1000             | 1080             | 781 (500 <sup>th</sup> )  | [5]        |
| $\text{Fe}_7\text{S}_8@\text{C}$ nanospheres               | 100              | 442              | 397 (200 <sup>th</sup> )  | [6]        |
| $\text{Fe}_7\text{S}_8@\text{C}$ composite                 | 2000             | 904              | 667 (200 <sup>th</sup> )  | [7]        |
| $\text{Fe}_7\text{S}_8/\text{CNF2-700}$                    | 1000             | 1091             | 675 (400 <sup>th</sup> )  | This work  |

## Reference:

- [1] Z. M. Liu, F. Hu, J. Xiang, C. Yue, D.S. Lee, T. Song, Part. Part. Syst. Char., 2018, **35**, 1800163.
- [2] Y. J. Zhang, W. Chang, J. Qu, S.M. Hao, Q.Y. Ji, Z. G. Jiang, Z. Z. Yu, Chem. Eur. J., 2018, **24**, 17339.
- [3] B. Y. Liu, F. H. Zhang, Q. L. Wu, J. H. Wang, W. G. Li, L. H. Dong, Y. S. Yin, Mater. Chem. Phys., 2015, **151**, 60.
- [4] Q. B. Zhang, J. Liao, M. Liao, J. Y. Dai, H. L. Ge, T. Duan, W.T. Yao, Appl. Surf. Sci., 2019, **473**, 799.
- [5] L. D. Shi, D. Z. Li, J. L. Yu, H. C. Liu, Y. Zhao, H. L. Xin, Y. M. Lin, C.D. Lin, C. H. Lia, C. L. Zhu, J. Mater. Chem. A, 2018, **6**, 7967.
- [6] K. L. Zhang, T. L. Zhang, J. W. Liang, Y. C. Zhu, N. Lin, Y. T. Qian, RSC Adv. 2015, **5**, 14828
- [7] F. Y. Jiang, Q. Wang, R. Du, X. S. Yan, Y. L. Zhou, Chem. Phys. Lett., 2018, **706**, 273.
